# Supplementary material for: Significant Differences in the Clinicopathological Characteristics and Survival of Gastric Cancer Patients from Two Cancer Centers in China and Korea
Source: PubMed Central journal article supplement — J Gastric Cancer. 2015 Mar 31;15(1):19–28. doi: 10.5230/jgc.2015.15.1.19 (PMC4389093; doi:10.5230/jgc.2015.15.1.19), 2015-03-31
Supplement: jgc-15-19-s002.pdf [file jgc-15-19-s002.pdf]

**Supplementary Table 1. Surgical characteristics of gastric cancer patients**

| Characteristic                      | China (n=1,637) | Korea (n=2,231) | P-value |
|-------------------------------------|-----------------|-----------------|---------|
| Operation                           |                 |                 | <0.001* |
| Total gastrectomy                   | 183 (11.1)      | 654 (29.4)      |         |
| Distal subtotal gastrectomy         | 1,245 (76.1)    | 1,577 (70.6)    |         |
| Proximal gastrectomy                | 209 (12.8)      | 0 (0.0)         |         |
| Multivisceral combined resection    | 51 (3.1)        | 183 (8.2)       |         |
| Reconstruction of digestive tract   |                 |                 | <0.001* |
| Billroth I                          | 497 (30.4)      | 218 (9.8)       |         |
| Billroth II                         | 723 (44.2)      | 1,302 (58.4)    |         |
| Roux-en-Y (Stomach-Jejunum)         | 25 (1.5)        | 57 (2.6)        |         |
| Roux-en-Y (Esophagus-Jejunum)       | 183 (11.2)      | 654 (29.2)      |         |
| Esophagogastrostomy                 | 209 (12.7)      | 0 (0.0)         |         |
| Lymphadenectomy                     |                 |                 | <0.001* |
| <D2                                 | 223 (13.6)      | 643 (28.8)      |         |
| ≥D2                                 | 1,414 (86.4)    | 1,588 (71.2)    |         |
| Surgery-related major complications | 96 (5.8)        | 133 (6.0)       | 0.899   |
| Postoperative chemotherapy          | 975 (59.6)      | 864 (38.7)      | <0.001* |

Values are presented as number (%). \*P<0.05.

**Supplementary Table 2. Major surgery-related complications**

| Major surgery-related complications | China (n=1,637) | Korea (n=2,231) |
|-------------------------------------|-----------------|-----------------|
| Anastomotic leakage                 | 15 (0.9)        | 35 (1.6)        |
| Anastomotic stenosis                | 24 (1.5)        | 20 (0.9)        |
| Intra-abdominal bleeding            | 12 (0.7)        | 13 (0.6)        |
| Postoperative ileus                 | 34 (2.1)        | 52 (2.3)        |
| Intra-abdominal infection           | 10 (0.6)        | 13 (0.6)        |
| Total cases                         | 95 (5.8)        | 133 (6.0)       |

Values are presented as number (%).
