# Supplementary material for: Significant Differences in the Clinicopathological Characteristics and Survival of Gastric Cancer Patients from Two Cancer Centers in China and Korea
Source: PubMed Central journal article supplement — J Gastric Cancer. 2015 Mar 31;15(1):19–28. doi: 10.5230/jgc.2015.15.1.19 (PMC4389093; doi:10.5230/jgc.2015.15.1.19), 2015-03-31
Supplement: jgc-15-19-s003.pdf [file jgc-15-19-s003.pdf]

Supplementary Table 3. Cox proportional hazards model for OS and PFS

| Variable                          | OS      |       |               | DFS     |       |               |
|-----------------------------------|---------|-------|---------------|---------|-------|---------------|
|                                   | P-value | HR    | 95% CI for HR | P-value | HR    | 95% CI for HR |
| Group                             | 0.001*  | 2.006 | 1.337~3.010   | 0.003*  | 1.775 | 1.220~2.582   |
| Age                               | 0.041*  | 1.012 | 1.000~1.024   | 0.012*  | 1.015 | 1.003~1.026   |
| TNM stage                         | <0.001* | 2.948 | 2.440~3.562   | <0.001* | 2.819 | 2.359~3.368   |
| BMI                               | 0.021*  | 0.964 | 0.934~0.995   | 0.069   | 0.972 | 0.942~1.002   |
| Family history of cancer          | 0.221   | 0.471 | 0.141~1.573   | 0.123   | 0.383 | 0.113~1.295   |
| Operation type                    | 0.869   | 0.983 | 0.800~1.207   | 0.768   | 0.971 | 0.800~1.179   |
| Reconstruction of digestive tract | 0.881   | 1.011 | 0.879~1.163   | 0.813   | 1.016 | 0.888~1.164   |
| Tumor location                    | 0.604   | 0.953 | 0.793~1.144   | 0.442   | 0.933 | 0.782~1.113   |
| Tumor size                        | 0.713   | 0.990 | 0.940~1.043   | 0.702   | 1.010 | 0.962~1.060   |
| Postoperative chemotherapy        | 0.509   | 1.129 | 0.787~1.620   | 0.583   | 1.102 | 0.779~1.558   |
| Differentiation                   | 0.742   | 0.947 | 0.685~1.309   | 0.602   | 0.923 | 0.683~1.247   |
| Lymph nodes harvested             | 0.287   | 0.994 | 0.982~1.005   | 0.181   | 0.992 | 0.981~1.004   |

OS = overall survival; PFS = progression-free survival; CI = confidence interval; HR = hazard ratio; TNM = tumor-node-metastasis; BMI = body mass index. \*P<0.05. Reference variables: group, Korean patients; age, younger patients; TNM stage, stage I; BMI, lower BMI; family history of cancer, positive family history of cancer; operation type, distal gastrectomy; reconstruction of digestive tract, Billroth I; tumor location, EJ junction; tumor size, smaller; postoperative chemotherapy, without chemotherapy; differentiation, undifferentiated; lymph nodes harvested, low harvest.
